# Supplementary material for: Evolution of fast-growing piscivorous herring in the young Baltic Sea
Source: PubMed Central journal article supplement (PMC11666761; doi:10.1038/s41467-024-55216-8), 2024-12-23
Supplement: 41467_2024_55216_MOESM1_ESM.pdf [file 41467_2024_55216_MOESM1_ESM.pdf]

# **Evolution of fast-growing piscivorous herring in the young Baltic Sea**

Jake Goodall<sup>1</sup>, Mats E. Pettersson<sup>1</sup>, Ulf Bergström<sup>2</sup>, Arianna Cocco<sup>1</sup>, Bo Delling<sup>3</sup>, Yvette Heimbrand<sup>2</sup>, Magnus Karlsson<sup>4</sup>, Josefine Larsson<sup>5</sup>, Hannes Waldetoft<sup>4</sup>, Andreas Wallberg<sup>1</sup>, Lovisa Wennerström<sup>2</sup>, Leif Andersson<sup>1,6\*</sup>

## **Supplementary Materials**

Supplementary Figs 1-6

Supplementary Tables 1-11

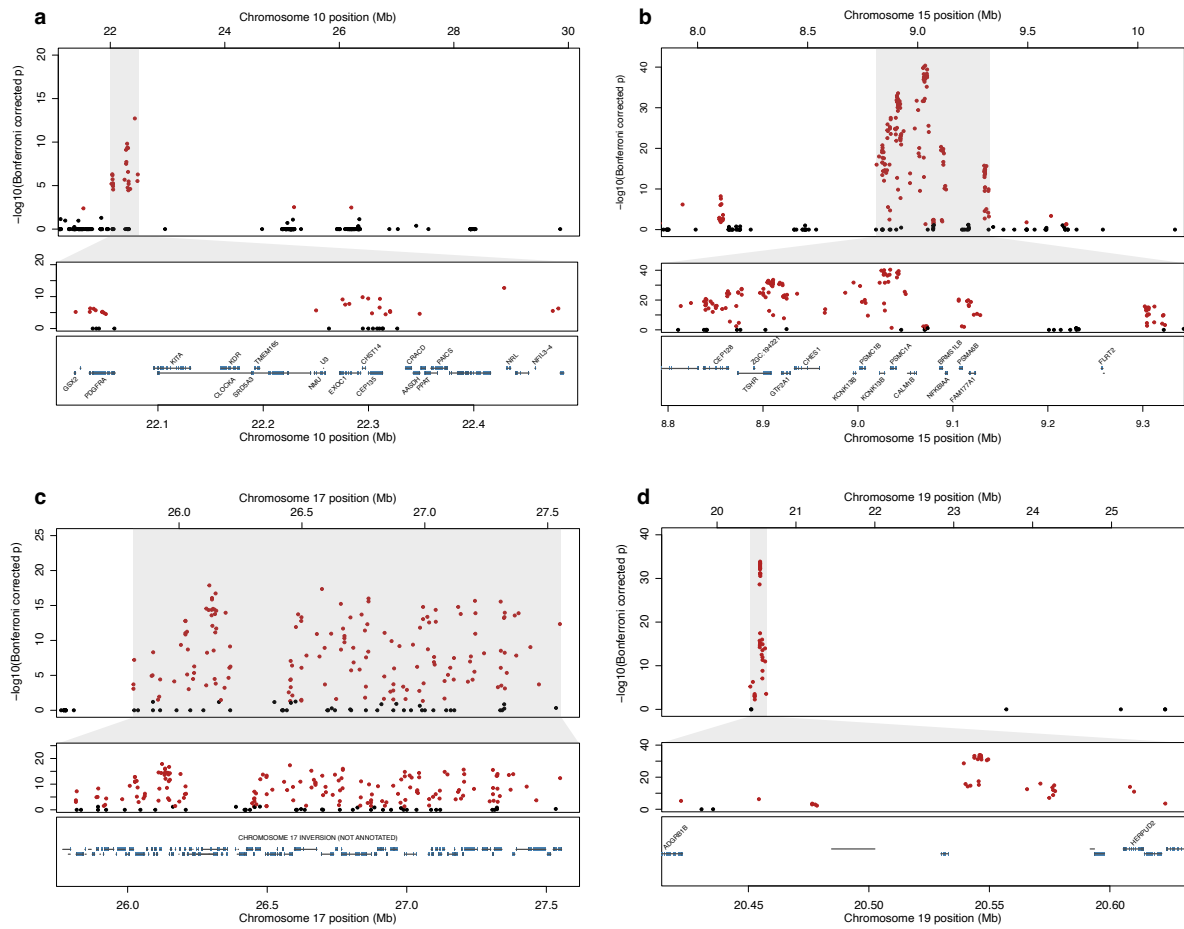

**Supplementary Fig. 1.** Summary of genome-wide, SNP-by-SNP, contrasts between spring-spawning Baltic herring and Slåttersill for the four main genomic regions on chromosomes 10 (a), 15 (b), 17 (c), and 19 (d). The topmost insets visualize chromosome-specific contrasts across the chromosome, while the centre and bottommost insets visualize a zoomed version of the peak region of interest (denoted by a grey box). Gene annotations intersecting with regions of interest are annotated in the bottommost inset, while points highlighted in red denote SNP with significant  $P$ -values (Bonferroni corrected  $P < 0.05$  from per SNP  $\chi^2$  test (d.f. = 1)). A list of all significant genes in the above plots is available from **Supplementary Data 1**. Chromosome 17 was not annotated as the region of interest spans the entire inversion region.

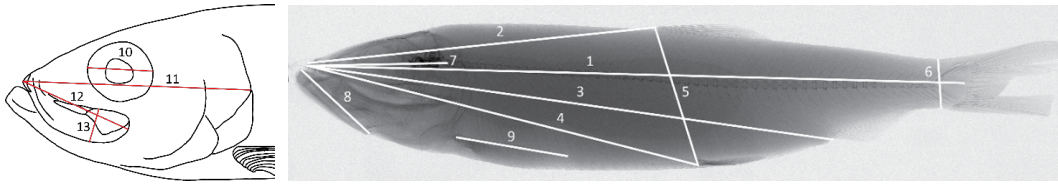

**Supplementary Fig. 2.** Measurements taken on *Clupea harengus* specimens; 1 standard length (SL), from upper jaw symphysis to middle base of caudal fin; 2, predorsal length from upper jaw symphysis to origin of dorsal fin; 3, preanal length, from upper jaw symphysis to origin of anal fin; 4, prepelvic length, from upper jaw symphysis to origin of pelvic fin; 5, body depth, origin of dorsal fin to origin of pelvic fins; 6, depth of caudal peduncle at origins of caudal fin procurrent fin rays; 7, cranium length, from upper jaw symphysis to articulation between the Atlas and next vertebra; 8, lower jaw length, from symphysis of dentary to retroarticular; 9, Pectoral fin length from base of first ray to tip of longest ray, digital calipers. 10, orbital horizontal diameter, x-ray; 11, head length, from upper jaw symphysis to posterior tip of operculum; 12, upper jaw length, from symphysis of premaxilla to posterior end of maxilla; 13, upper jaw depth, as greatest depth of maxilla and supramaxilla.

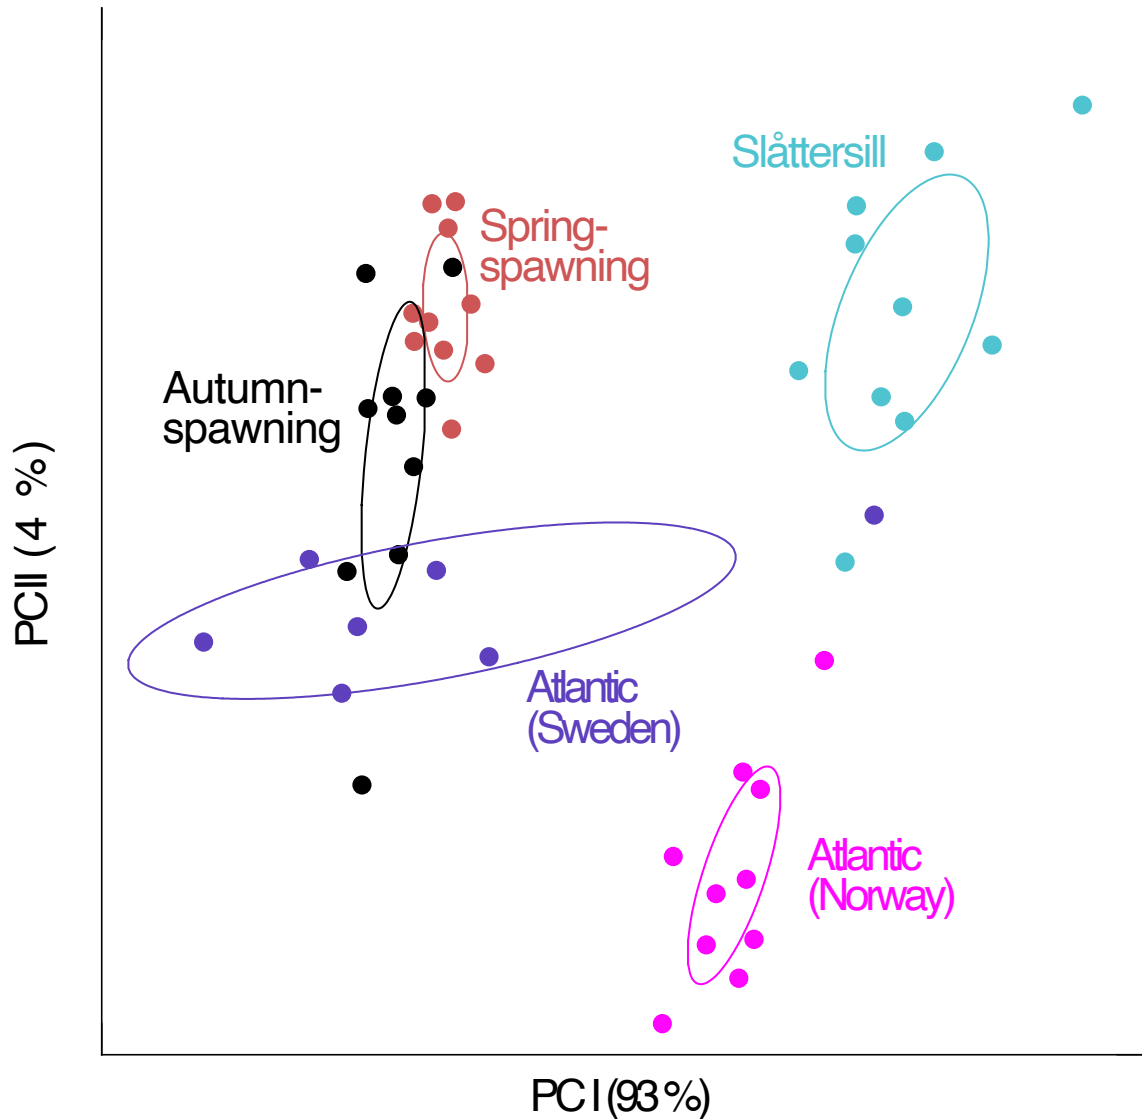

**Supplementary Fig. 3.** Principal component analysis of size and shape summarizing morphometric variation based on log-transformed measurement obtained from 47 specimens of *Clupea harengus* as shown in **Supplementary Data 2**. Corresponding character loadings are given in **Supplementary Table 3**. Ellipses indicate centroid positions with 95% confidence interval.

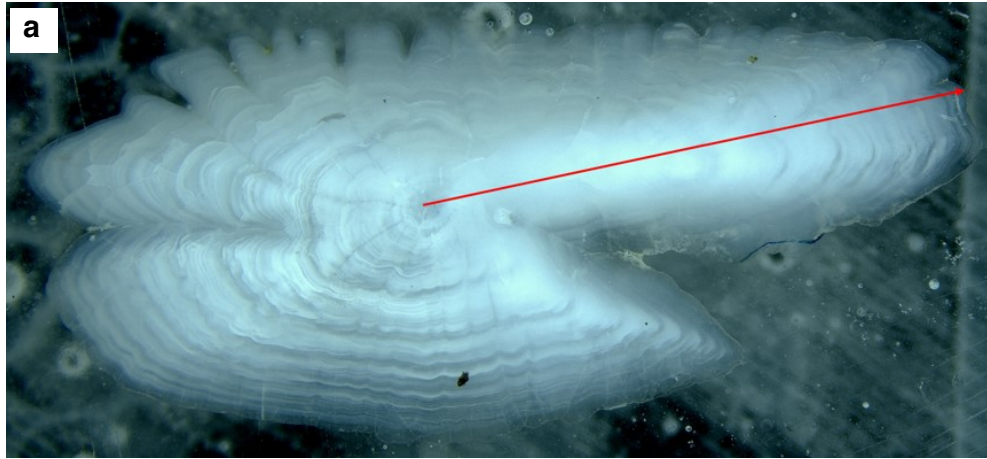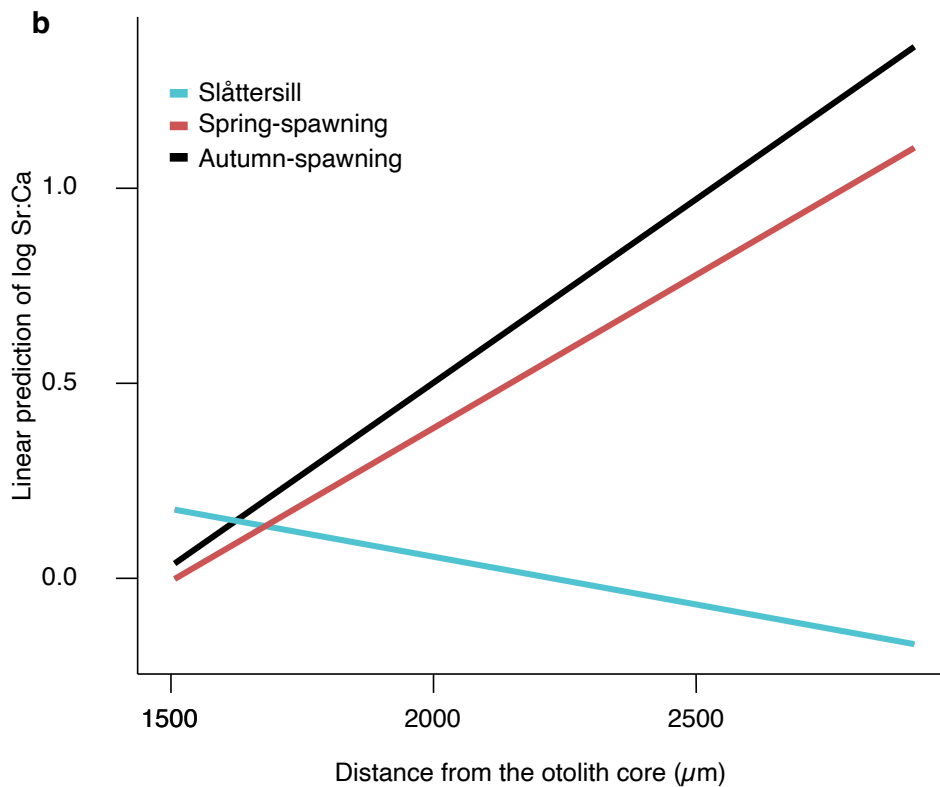

**Supplementary Fig. 4.** Results of otolith analysis. (a) Illustration of line transect (red line) from the otolith core to the anterior rostrum edge (top panel) used in lifelong otolith strontium:calcium profiling. (b) Pairwise comparison of otolith log transformed Sr:Ca slopes of Slåttersill (blue), autumn-spawning Baltic herring (black) and spring-spawning Baltic herring (red) from Gävlebukten. Only data from  $\geq 1500 \mu\text{m}$  from the core were used in the analysis, corresponding to otolith material from adult herring only.

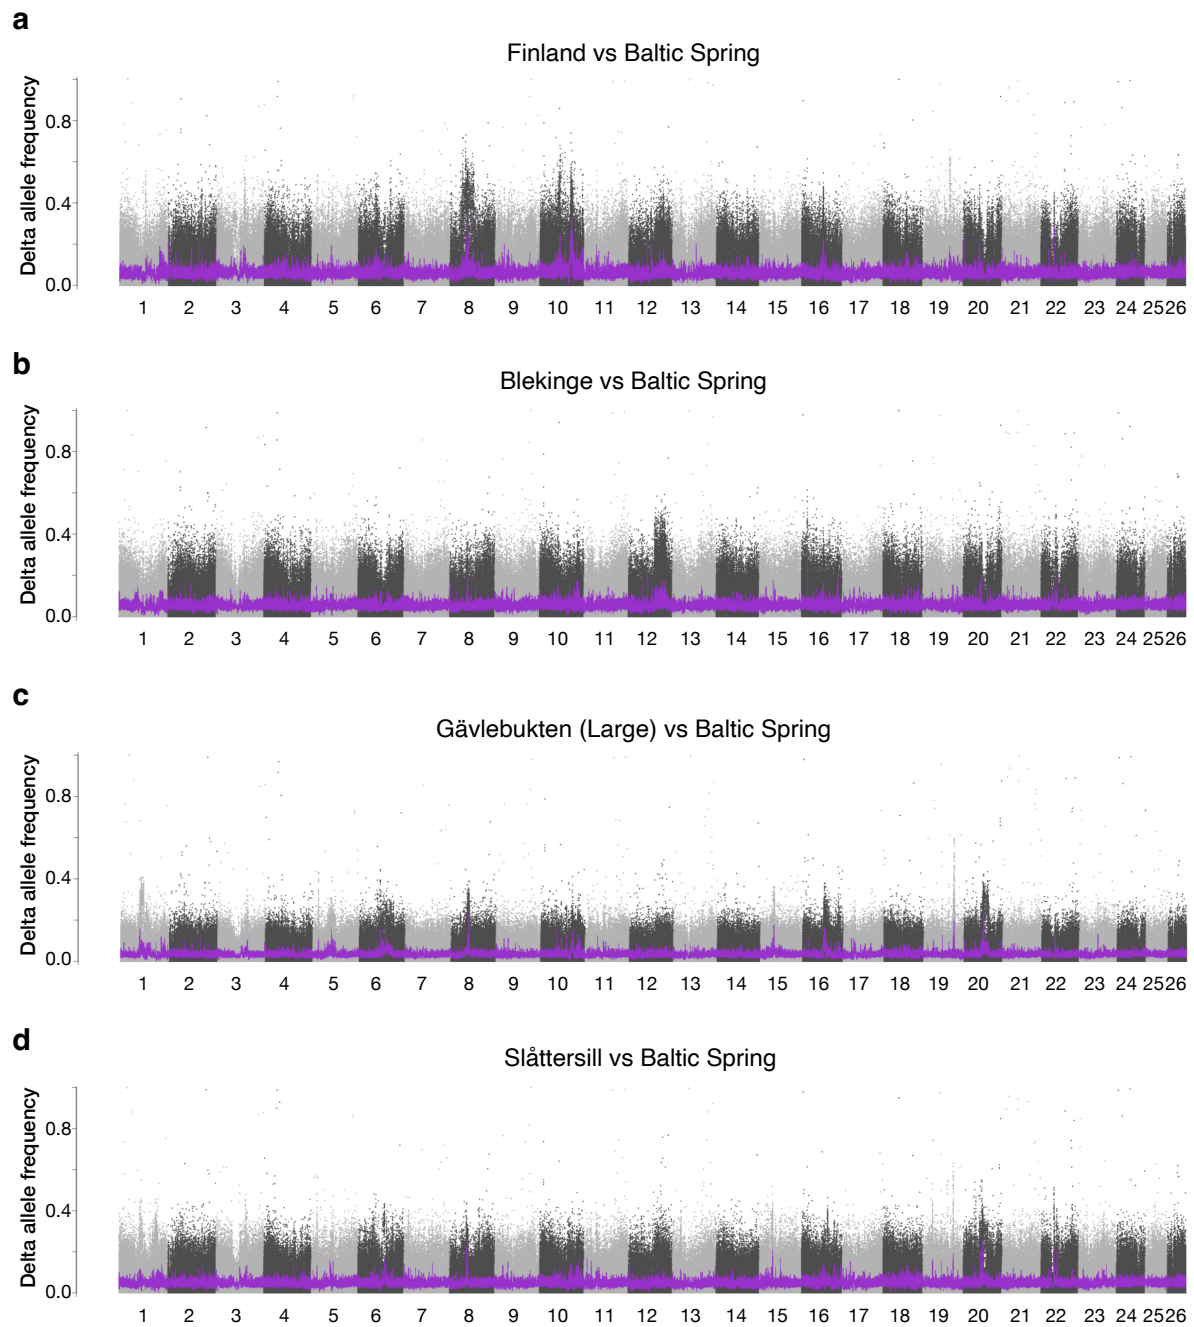

**Supplementary Fig. 5 (continues on next page).** Pairwise delta allele frequency contrasts between previously reported allele frequencies for small spring-spawning Baltic herring based on pooled whole genome sequencing<sup>16</sup> and various population samples of large herring based on individual whole genome sequencing in this study. **(a)** Finland ( $n=6$ ), **(b)** Blekinge ( $n=7$ ), **(c)** Gävlebukten ( $n=24$ ), **(d)** Slåttersill ( $n=10$ ), **(e)** Stockholm ( $n=16$ ), **(f)** Östergötland ( $n=6$ ), and **(g)** Kalmar ( $n=7$ ). Notably, plots **a – d** represent large herring that exhibit a Northern haplotype at chr12, while plots **e – g** represent large herring with the Southern chr12 haplotype.

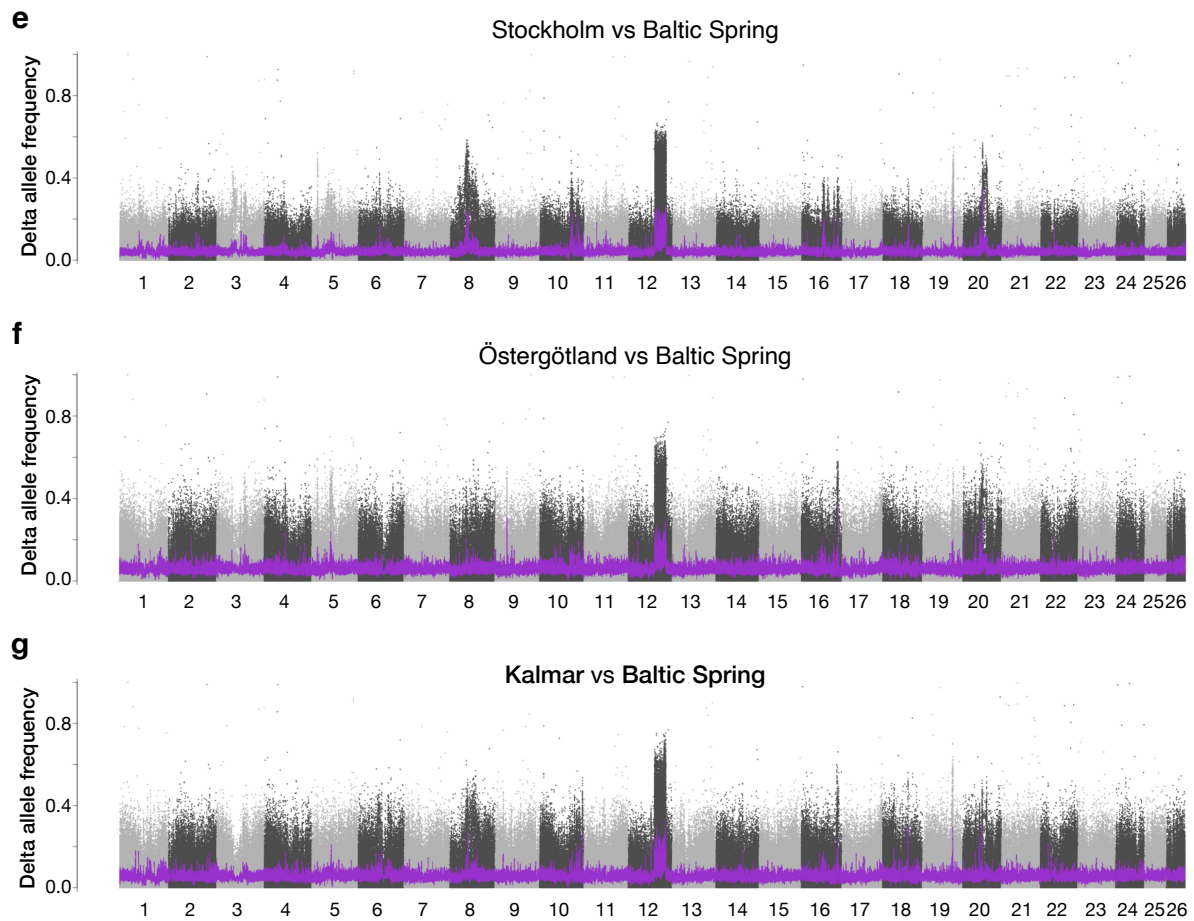

**Supplementary Fig. 5.** Pairwise delta allele frequency contrasts between previously reported allele frequencies for small spring-spawning Baltic herring based on pooled whole genome sequencing<sup>16</sup> and various population samples of large herring based on individual whole genome sequencing in this study. **(a)** Finland ( $n=6$ ), **(b)** Blekinge ( $n=7$ ), **(c)** Gävlebukten ( $n=24$ ), **(d)** Slåttersill ( $n=10$ ), **(e)** Stockholm ( $n=16$ ), **(f)** Östergötland ( $n=6$ ), and **(g)** Kalmar ( $n=7$ ). Notably, plots **a – d** represent large herring that exhibit a Northern haplotype at chr12, while plots **e – g** represent large herring with the Southern chr12 haplotype.

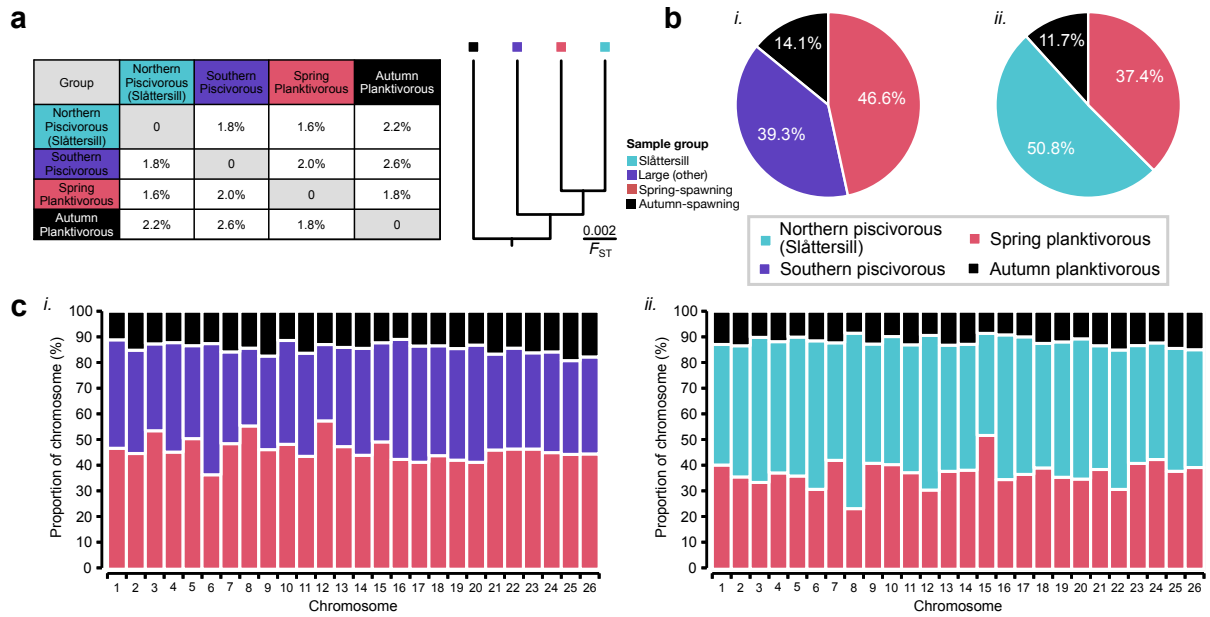

**Supplementary Fig. 6.** Pairwise genetic divergence among Baltic herring ecotypes. **(a)** Pairwise  $F_{ST}$ -matrix (left) and corresponding UPGMA clustering (right). Comparing northern piscivorous herring (*i*) and southern piscivorous herring (*ii*), the pie charts **(b)** show the overall proportion of 10-kbp windows across chromosomes 1–26 ( $n=79,406$ ) with the lowest  $F_{ST}$  between each piscivorous population and each of the other ecotypes, and the stacked bar plots **(c)** show the corresponding signature on a chromosome-by-chromosome basis.



**Supplementary Table 1.** Summary of Baltic herring sampled from southern Bothnian Sea in 2022 and 2023 used for SNP genotyping on the MultiFishSNPChip\_1.0 array (FSHSTK1D). Population number assignments are defined and displayed geographically in Fig. 1a.

| Ecotype         | Population | Location   | Latitude | Longitude | Year sampled | Date sampled | Number of fish (n) | Average weight (g) | Average length (cm) |
|-----------------|------------|------------|----------|-----------|--------------|--------------|--------------------|--------------------|---------------------|
| Slättersill     | 1          | Hästkär    | 60.532   | 17.730    | 2022         | 2022-06-16   | 30                 | 192.0              | 28.5                |
| Slättersill     | 1          | Hästkär    | 60.532   | 17.730    | 2023         | 2023-06-15   | 78                 | 181.0              | 27.8                |
| Spring-spawning | 2          | Stocka     | 61.540   | 17.280    | 2022         | 2022-04-13   | 30                 | 38.3               | 18.7                |
| Autumn-spawning | 3          | Eggegrund  | 60.737   | 17.561    | 2022         | 2022-10-19   | 30                 | 51.0               | 19.9                |
| Autumn-spawning | 4          | Fagerviken | 60.542   | 17.741    | 2022         | 2022-09-05   | 30                 | 49.3               | 19.5                |
| Spring-spawning | 5          | Hästkär    | 60.532   | 17.730    | 2022         | 2022-06-01   | 30                 | 55.7               | 21.0                |
| Spring-spawning | 5          | Hästkär    | 60.532   | 17.730    | 2023         | 2023-06-18   | 60                 | 55.8               | 20.0                |
| Spring-spawning | 6          | Norrsundet | 60.936   | 17.372    | 2022         | 2022-06-14   | 30                 | 47.7               | 20.0                |
| Spring-spawning | 7          | Lötbäcken  | 61.250   | 17.110    | 2022         | 2022-05-23   | 30                 | 46.4               | 19.9                |
| Autumn-spawning | 8          | Limön      | 60.410   | 17.350    | 2022         | 2022-09-05   | 36                 | 41.3               | 18.2                |

**Supplementary Table 2.** Summary of age estimates based on the analysis of otoliths (Spring-spawning Baltic herring:  $\bar{x}-\bar{y} = 3.42$  years, *C.I.* = 2.06 – 4.78 years, two-sided t-test,  $t(49) = 5.06$ ,  $P = 6.4 \times 10^{-8}$ ; Autumn-spawning Baltic herring:  $\bar{x}-\bar{y} = 2.48$  years, *C.I.* = 1.34 – 3.61 years, two-sided t-test,  $t(49) = 4.39$ ,  $P = 6.0 \times 10^{-8}$ ).

|                                | Number of fish (n) | Age at capture    |            |
|--------------------------------|--------------------|-------------------|------------|
|                                |                    | Mean ( $\pm$ SD)  | <i>P</i> * |
| Slåttersill                    | 31                 | 7.2 ( $\pm$ 3.4)  | -          |
| Spring-spawning Baltic herring | 31                 | 10.1 ( $\pm$ 3.2) | 0.001      |
| Autumn-spawning Baltic herring | 26                 | 9.2 ( $\pm$ 2.3)  | 0.006      |

**Supplementary Table 3.** Character loadings on principal component I-V for 13 morphological measurements taken on 47 specimens of *Clupea harengus*.

|                                     | I     | II     | III    | IV     | V      |
|-------------------------------------|-------|--------|--------|--------|--------|
| Standard length                     | 0.183 | -0.014 | 0.004  | 0.002  | 0.013  |
| Orbital horizontal diameter         | 0.087 | 0.055  | -0.017 | 0.000  | 0.009  |
| Head length                         | 0.150 | 0.020  | 0.005  | -0.018 | -0.008 |
| Cranium length                      | 0.136 | 0.053  | -0.012 | 0.012  | -0.001 |
| Body depth                          | 0.239 | -0.047 | -0.035 | 0.011  | -0.024 |
| Caudal peduncle depth               | 0.216 | -0.060 | 0.013  | -0.005 | 0.014  |
| Predorsal length                    | 0.183 | -0.006 | -0.001 | -0.001 | 0.012  |
| Preanal length                      | 0.189 | -0.009 | 0.001  | 0.009  | 0.008  |
| Prepelvic length                    | 0.180 | 0.005  | 0.001  | 0.012  | 0.003  |
| Lower jaw length                    | 0.147 | 0.045  | 0.003  | 0.007  | 0.008  |
| Upper jaw length                    | 0.148 | 0.034  | -0.002 | -0.014 | -0.009 |
| Upper jaw height                    | 0.136 | 0.013  | 0.051  | 0.012  | -0.019 |
| Pectoral fin length                 | 0.174 | 0.003  | -0.001 | -0.030 | -0.004 |
| Variance explained by components    | 0.380 | 0.016  | 0.004  | 0.002  | 0.002  |
| Percent of total variance explained | 93.3  | 3.9    | 1.1    | 0.5    | 0.4    |

**Supplementary Table 4.** Summary of biochemical comparison of Slåttersill (5 pools,  $n=98$  fish total) and spring-spawning Baltic herring (9 pools,  $n=170$ ) sampled from Gävlebukten across 2022 and 2023. All  $P$  values were derived from two-sided t-tests comparing Slåttersill and spring-spawning Baltic herring.

|                                        | Mean ( $\pm$ SD)   |                                   | $P$ -value |
|----------------------------------------|--------------------|-----------------------------------|------------|
|                                        | Slåttersill        | Spring-spawning<br>Baltic herring |            |
| <i>Pollutant analysis</i>              |                    |                                   |            |
| Fat content (%)                        | 10.0 ( $\pm$ 2.1)  | 3.9 ( $\pm$ 0.6)                  | 0.002      |
| $\Sigma$ PCDD/F (pg TEQ/g ww)          | 2.2 ( $\pm$ 0.5)   | 5.2 ( $\pm$ 0.8)                  | <0.001     |
| $\Sigma$ PCDD/F + dl-PCB (pg TEQ/g ww) | 5.2 ( $\pm$ 1.0)   | 8.6 ( $\pm$ 1.7)                  | 0.001      |
| $\Sigma$ PCB6 (ng/g ww)                | 33.2 ( $\pm$ 7.3)  | 40.4 ( $\pm$ 6.4)                 | 0.104      |
| <i>Isotope analysis</i>                |                    |                                   |            |
| N (%)                                  | 9.9 ( $\pm$ 0.9)   | 11.8 ( $\pm$ 1.0)                 | 0.005      |
| $\delta^{15}\text{N}$ (‰)              | 10.5 ( $\pm$ 0.3)  | 10.4 ( $\pm$ 0.4)                 | 0.68       |
| $F_N$ (%)                              | 0.4 ( $\pm$ 0.0)   | 0.4 ( $\pm$ 0.0)                  | 0.524      |
| C (%)                                  | 57.2 ( $\pm$ 1.7)  | 53.2 ( $\pm$ 2.7)                 | 0.005      |
| $\delta^{13}\text{C}$ (‰)              | -24.3 ( $\pm$ 0.6) | -22.8 ( $\pm$ 0.7)                | 0.002      |
| $F_C$ (%)                              | 1.1 ( $\pm$ 0.0)   | 1.1 ( $\pm$ 0.0)                  | 0.002      |
| C/N ratio                              | 5.8 ( $\pm$ 0.7)   | 4.5 ( $\pm$ 0.6)                  | 0.008      |

**Supplementary Table 5.** Results of pairwise comparison of otolith log transformed Sr:Ca slopes ( $\geq 1500 \mu\text{m}$  from the core) of Slåttersill, spring- and autumn spawning herring from Gävlebukten based on estimated marginal means from a mixed effects model (**Supplementary Fig. 4b**). CL = confidence level.

| Pairwise comparison               | Estimate | SE       | df   | Lower CL | Upper CL | T ratio | <i>P</i> value |
|-----------------------------------|----------|----------|------|----------|----------|---------|----------------|
| Slåttersill - Autumn-spawning     | 0.0012   | 4.53e-05 | 1731 | 0.001    | 0.001    | 26.147  | <0.001         |
| Slåttersill - Spring-spawning     | -0.0010  | 2.38e-05 | 1718 | -0.001   | -0.001   | -43.169 | <0.001         |
| Autumn-spawning - Spring-spawning | 0.0001   | 4.89e-05 | 1730 | 0.000    | 0.000    | 3.185   | 0.004          |

**Supplementary Table 6.** Summary of large herring and control sample (Gävleborg, Norrsundet) sampled from the Baltic Sea for whole genome sequencing. Population number assignments are defined and displayed geographically in Fig. 1a.

| Ecotype         | Population | Locality     | Location     | Date sampled           | Number of fish (n) | Average weight (g) | Average length (cm) |
|-----------------|------------|--------------|--------------|------------------------|--------------------|--------------------|---------------------|
| Slättersill     | 1          | Uppland      | Hästkär      | 2022-06-16             | 10                 | 254.0              | 30.7                |
| Large           | 9          | Blekinge     | Karlskrona   | 2020-09-16, 2020-11-07 | 7                  | 86.6               | 23.4                |
| Large           | 10         | Finland      | Helsinki     | 2021-03-23             | 6                  | 423.3              | 35.8                |
| Large           | 11         | Gävleborg    | Storjungfrun | 2020-10-27, 2020-10-28 | 14                 | 159.9              | 27.4                |
| Large           | 11         | Gävleborg    | Stations     | 2020-11-05             | 4                  | 203.8              | 29.2                |
| Large           | 11         | Gävleborg    | Iggön        | 2020-10-30, 2020-08-20 | 6                  | 64.5               | 21.0                |
| Large           | 12         | Kalmar       | Västervik    | 2020-10-30             | 7                  | 72.9               | 22.4                |
| Large           | 13         | Östergötland | Birkö        | 2020-09-22             | 6                  | 62.0               | 19.8                |
| Large           | 14         | Stockholm    | Ornö         | 2020-11-30, 2020-09-30 | 16                 | 165.8              | 27.0                |
| Spring-spawning | 15         | Gävleborg    | Norrsundet   | 2022-06-14             | 10                 | 48.0               | 20.0                |

**Supplementary Table 7.** Levels of genetic variation across the genome (chromosomes 1 to 26) and estimated effective population. The analysis is based on the assumption that all sites along chromosomes were accessible (n=724,810,791 bp). Long-term inference of effective population size ( $N_e$ ) estimated assuming mutation-drift equilibrium in an idealized population.

| Group                             | Sample size (n) | SNPs (n)   | $\theta_w$ /bp | $\pi$ /bp | Tajima's D | $N_e$ (n) |
|-----------------------------------|-----------------|------------|----------------|-----------|------------|-----------|
| Spring planktivorous <sup>1</sup> | 80              | 16,944,883 | 0.0047         | 0.21      | -1.92      | 590,007   |
| Autumn planktivorous <sup>2</sup> | 60              | 15,266,334 | 0.0045         | 0.22      | -1.84      | 564,593   |
| Northern piscivorous <sup>3</sup> | 68              | 17,268,431 | 0.0050         | 0.24      | -1.86      | 621,815   |
| Southern piscivorous <sup>4</sup> | 58              | 15,098,960 | 0.0045         | 0.23      | -1.78      | 562,528   |
